# Supplementary material for: Dramatic luminescence signal from a Co(ii)-based metal–organic compound due to the construction of charge-transfer bands with Al3+ and Fe3+ ions in water: steady-state and time-resolved spectroscopic studies
Source: Royal Society of Chemistry journal article supplement (doi:10.1039/d0nj00295j), 2020-01-01
Supplement: d0nj00295j1.pdf [file d0nj00295j1.pdf]

New Journal of Chemistry

**Dramatic Luminescence Signal from a Co(II) based Metal Organic  
Compound due to Construction of Charge Transfer Bands with Al<sup>3+</sup> and Fe<sup>3+</sup>  
ions in Water: Steady State and Time Resolved Spectroscopic Studies**

Pooja Daga,<sup>a</sup> Prakash Majee,<sup>a</sup> Debal Kanti Singha,<sup>a,b</sup> Priyanka Manna,<sup>b</sup> Sayani Hui,<sup>b</sup> Ananta  
Kumar Ghosh,<sup>c</sup> Partha Mahata<sup>b\*</sup> and Sudip Kumar Mondal<sup>a\*</sup>

<sup>a</sup>Department of Chemistry, Siksha-Bhavana, Visva-Bharati University, Santiniketan-731235, West Bengal, India. Email: [sudip.mondal@visva-bharati.ac.in](mailto:sudip.mondal@visva-bharati.ac.in)

<sup>b</sup>Department of Chemistry, Jadavpur University, Jadavpur, Kolkata-700 032, West Bengal, India.  
Email: [parthachem@gmail.com](mailto:parthachem@gmail.com)

<sup>c</sup>Department of Chemistry, Burdwan Raj College, Burdwan, Burdwan-713104, West Bengal, India

**ELECTRONIC SUPPLEMENTARY INFORMATION**

---

\* Corresponding Authors, E-mail: [sudip.mondal@visva-bharati.ac.in](mailto:sudip.mondal@visva-bharati.ac.in), [parthachem@gmail.com](mailto:parthachem@gmail.com)

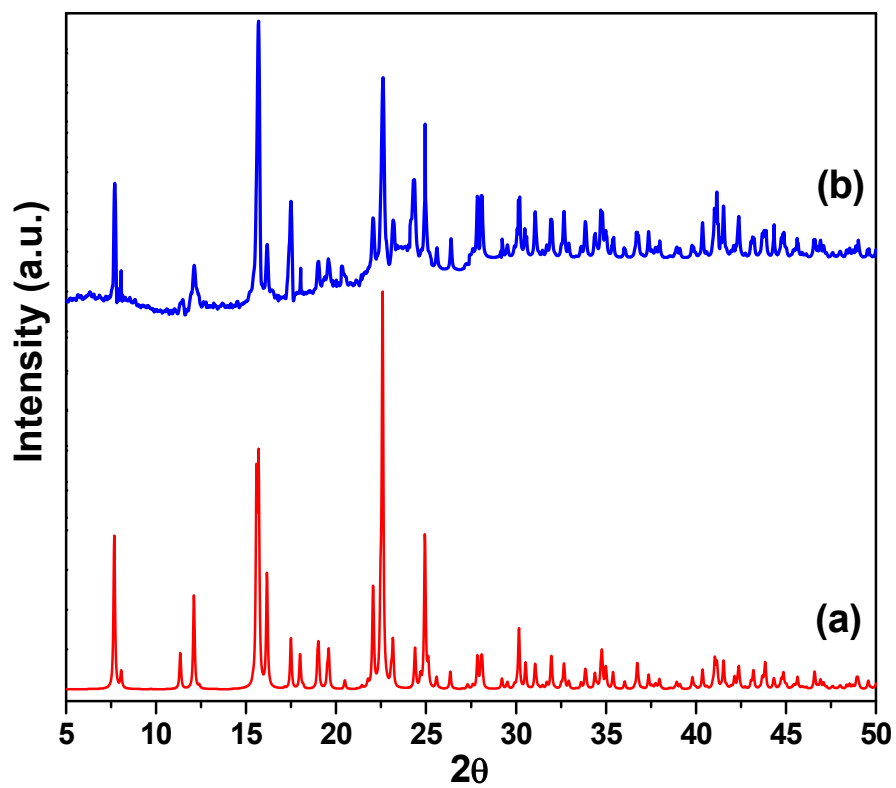

**Fig. S1.** Powder XRD ( $\text{CuK}\alpha$ ) patterns of  $[\text{Co}(\text{bpds})(\text{bdc})(\text{H}_2\text{O})_2].\text{bpds}$ , **1**: (a) simulated from single crystal X-ray data, (b) experimental.

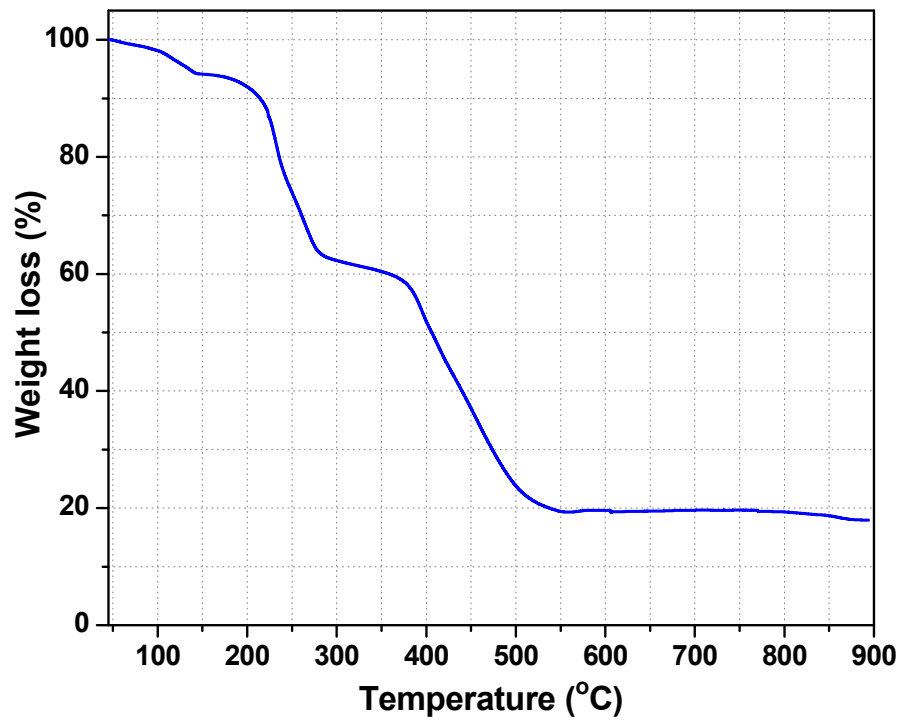

**Fig. S2.** Thermogravimetric analysis (TGA) data of [Co(bpds)(bdc)(H<sub>2</sub>O)<sub>2</sub>].bpds, **1**, in nitrogen atmosphere. The plot shows % weight loss of **1** with increase in temperature.

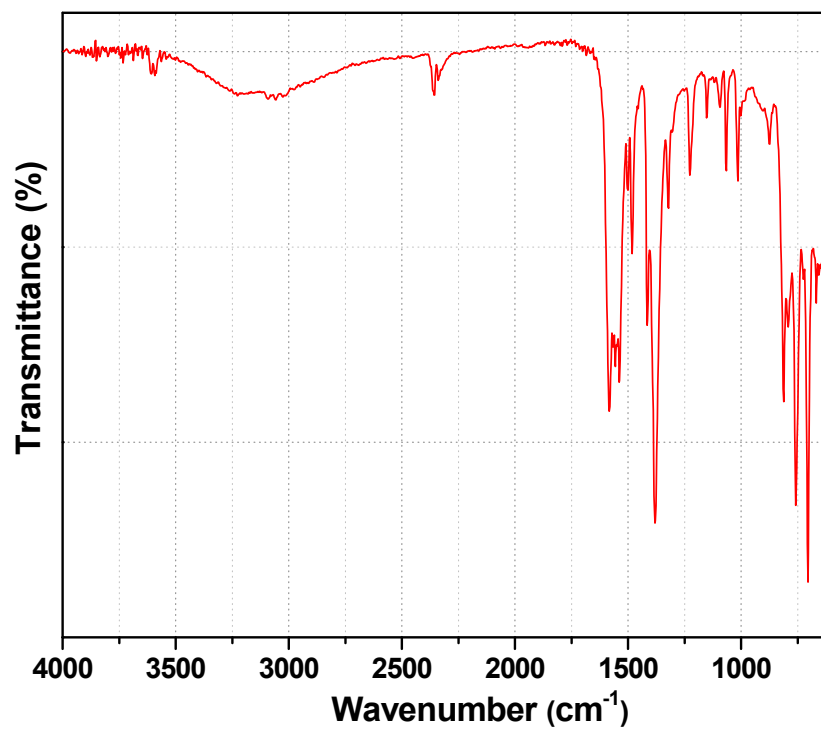

Fig. S3. IR spectrum of  $[\text{Co}(\text{bpds})(\text{bdc})(\text{H}_2\text{O})_2]\cdot\text{bpds}$ , 1.

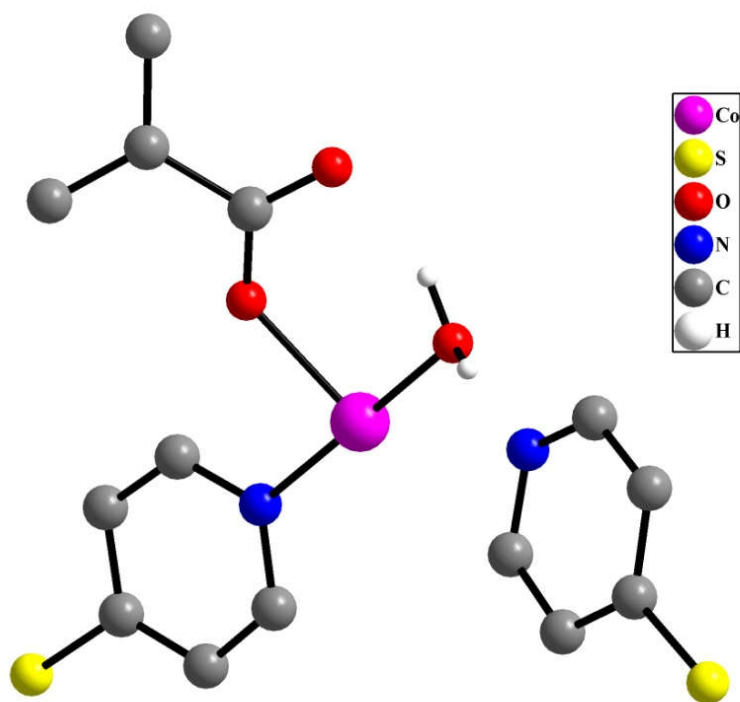

**Fig. S4.** Figure shows asymmetric unit in the structure of  $[\text{Co}(\text{bpds})(\text{bdc})(\text{H}_2\text{O})_2]\cdot\text{bpds}$ , **1**.

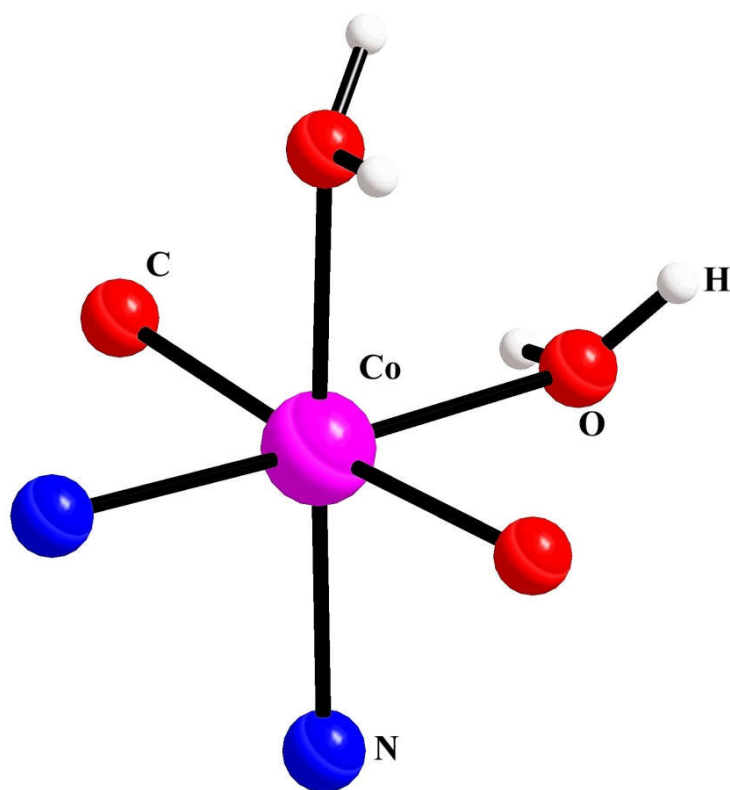

**Fig. S5.** Figure shows the octahedral coordination around  $\text{Co}^{2+}$  ion in  $[\text{Co}(\text{bpds})(\text{bdc})(\text{H}_2\text{O})_2]\cdot\text{bpds}$ , **1**.

**Table S1:** Selected bond distances (Å) observed in [Co(bpds)(bdc)(H<sub>2</sub>O)<sub>2</sub>].bpds, **1**.

| Bond          | Distances, Å | Bond          | Distances, Å |
|---------------|--------------|---------------|--------------|
| Co(01)-O(1)   | 2.0758(18)   | Co(01)-O(3)#1 | 2.127(2)     |
| Co(01)-O(1)#1 | 2.0759(19)   | Co(01)-N(1)   | 2.185(2)     |
| Co(01)-O(3)   | 2.127(2)     | Co(01)-N(1)#1 | 2.185(2)     |

Symmetry transformations used to generate equivalent atoms: #1 -x+5/4,-y+5/4,z

**Table S2:** Selected bond angles observed in [Co(bpds)(bdc)(H<sub>2</sub>O)<sub>2</sub>].bpds, **1**.

| Angle                | Amplitude (°) | Angle                | Amplitude (°) |
|----------------------|---------------|----------------------|---------------|
| O(1)-Co(01)-O(1)#1   | 175.04(12)    | O(3)-Co(01)-N(1)     | 177.88(10)    |
| O(1)-Co(01)-O(3)     | 90.23(9)      | O(3)#1-Co(01)-N(1)   | 86.76(10)     |
| O(1)#1-Co(01)-O(3)   | 86.29(9)      | O(1)-Co(01)-N(1)#1   | 94.01(9)      |
| O(1)-Co(01)-O(3)#1   | 86.30(9)      | O(1)#1-Co(01)-N(1)#1 | 89.33(8)      |
| O(1)#1-Co(01)-O(3)#1 | 90.23(9)      | O(3)-Co(01)-N(1)#1   | 86.76(10)     |
| O(3)-Co(01)-O(3)#1   | 91.15(15)     | O(3)#1-Co(01)-N(1)#1 | 177.88(10)    |
| O(1)-Co(01)-N(1)     | 89.33(8)      | N(1)-Co(01)-N(1)#1   | 95.34(13)     |
| O(1)#1-Co(01)-N(1)   | 94.02(9)      |                      |               |

Symmetry transformations used to generate equivalent atoms: #1 -x+5/4,-y+5/4,z

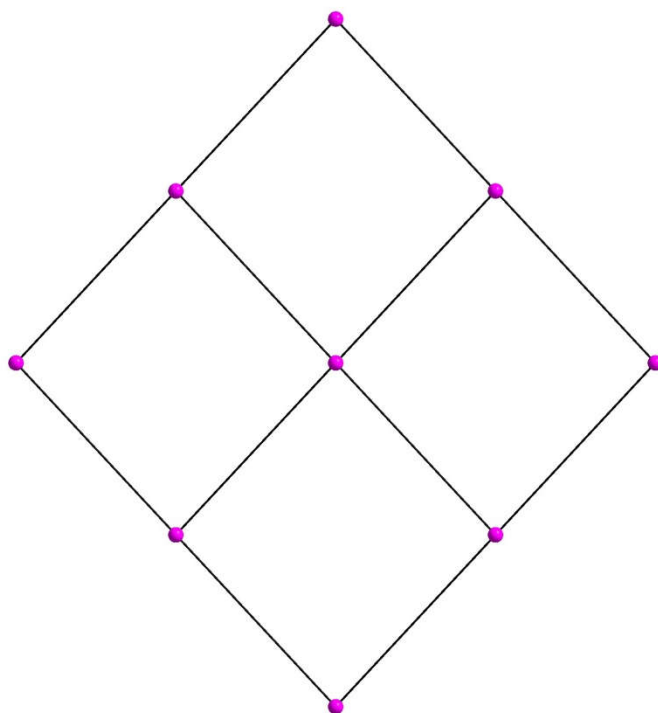

**Fig. S6.** Figure shows the 4,4-network in  $[\text{Co}(\text{bpds})(\text{bdc})(\text{H}_2\text{O})_2]\cdot\text{bpds}$ , **1**.



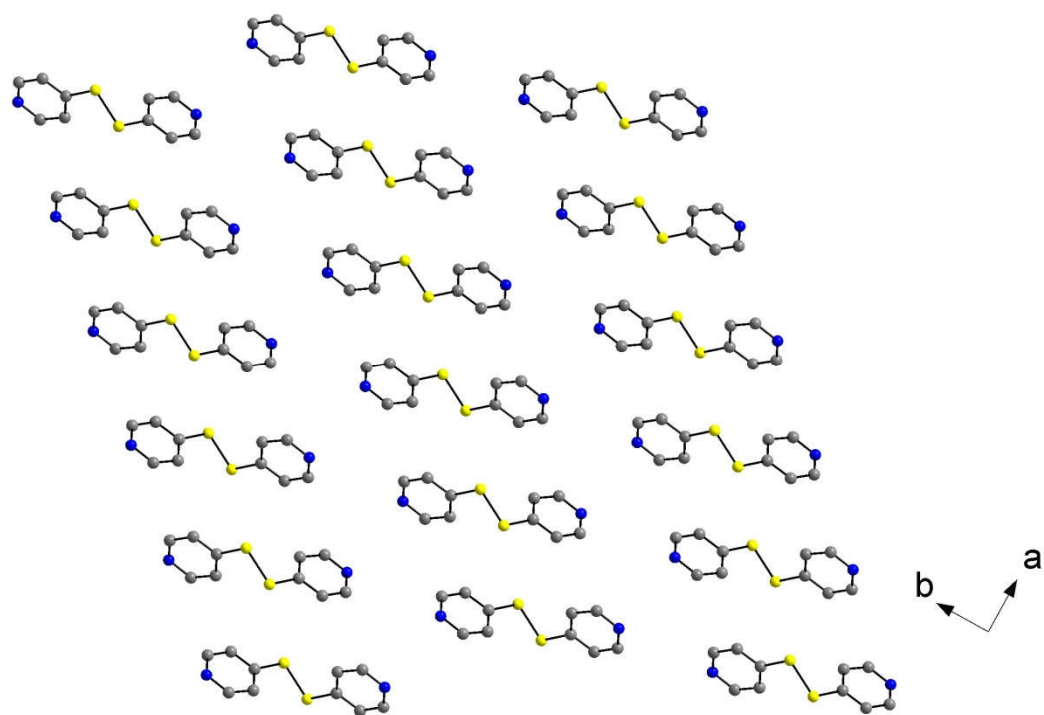

**Fig. S7.** Figure shows the arrangement of non-bonded bpds in the inter-layer position of [Co(bpds)(bdc)(H<sub>2</sub>O)<sub>2</sub>].bpds, **1**.

**Table S3:** Potential Hydrogen bonds (Å) observed in [Co(bpds)(bdc)(H<sub>2</sub>O)<sub>2</sub>].bpds, **1**.

| Donor<br>H...Acceptor              | D - H, Å | H...A, Å | D...A, Å  | D - H...A, Degree |
|------------------------------------|----------|----------|-----------|-------------------|
| O(3)--H(3A)..N(2) <sup>#1</sup>    | 0.77     | 2.11     | 2.8694(2) | 166               |
| O(3)--H(3B)..O(2) <sup>Intra</sup> | 0.82     | 1.92     | 2.6875(2) | 157               |

Symmetry operations used to generate equivalent atoms: #1 1-x,1/4+y,1/4+z

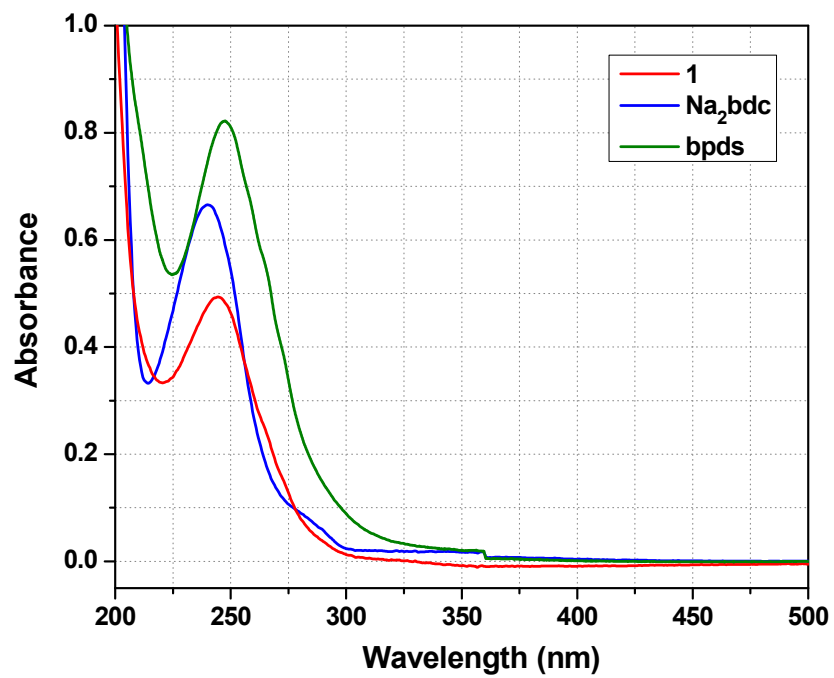

Fig. S8. UV-visible absorption spectra of **1** and the ligands (bpds and Na<sub>2</sub>bdc).

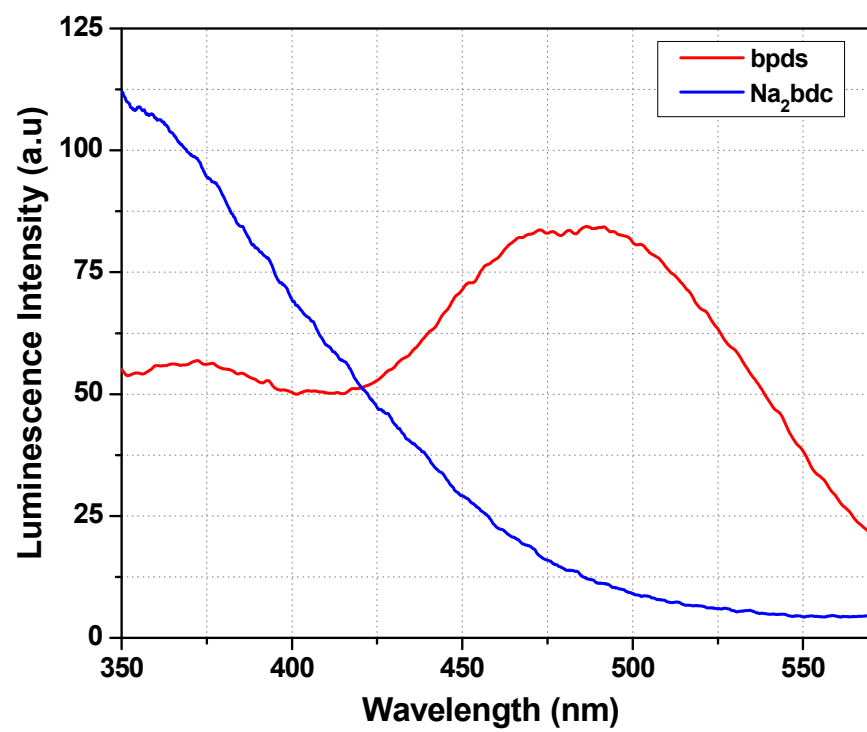

Fig. S9. Emission spectra of bpdS and Na<sub>2</sub>bdc excited at 300 nm.

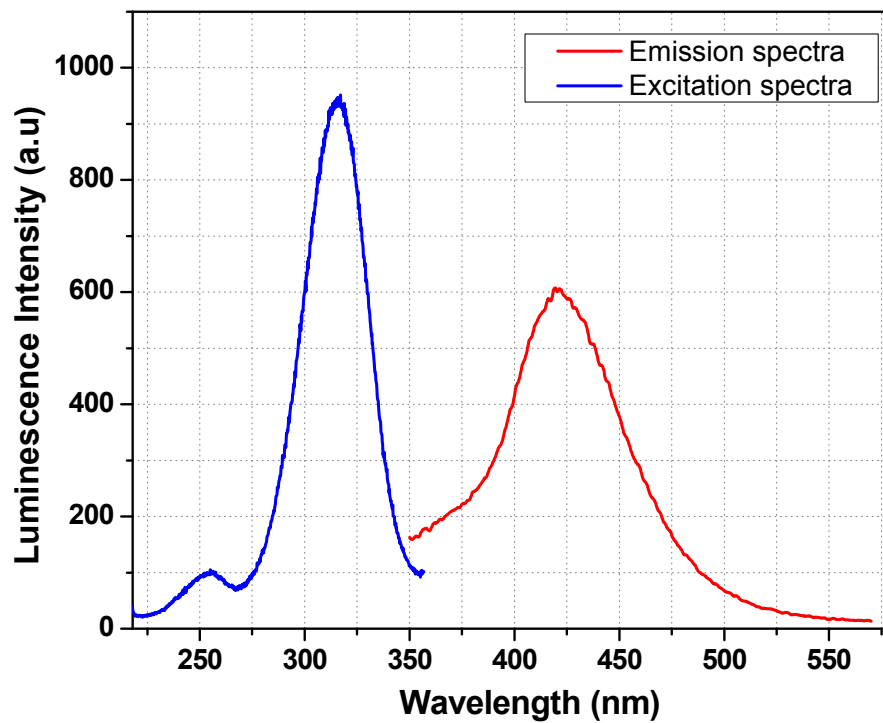

**Fig. S10.** Excitation and emission spectra of **1**. The excitation wavelength was chosen at 300 nm for emission spectra and for the excitation spectra, emission was fixed at 421 nm.

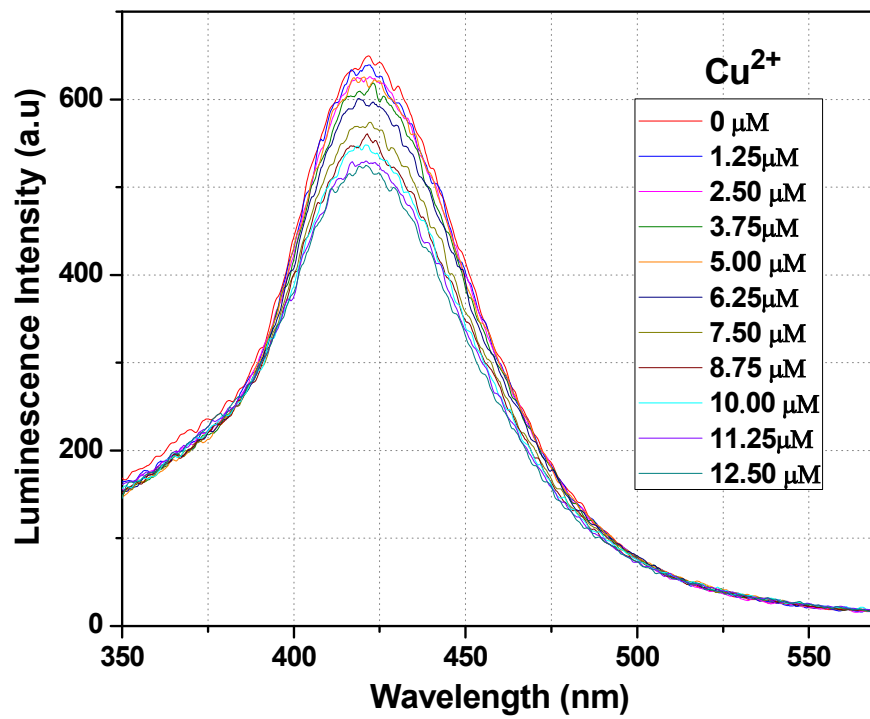

**Fig. S11.** Emission spectra of **1** dispersed in water upon incremental addition of Cu<sup>2+</sup> solution ( $\lambda_{\text{ex}} = 300$  nm). Final concentration of Cu<sup>2+</sup> in the medium is indicated in the legend.

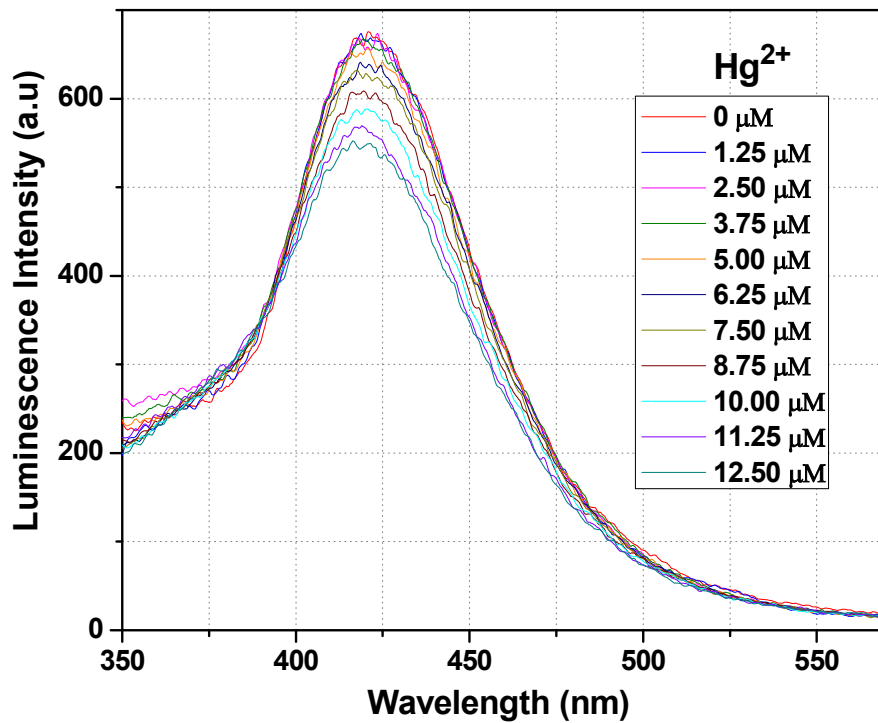

**Fig. S12.** Emission spectra of **1** dispersed in water upon incremental addition of  $\text{Hg}^{2+}$  solution ( $\lambda_{\text{ex}} = 300$  nm). Final concentration of  $\text{Hg}^{2+}$  in the medium is indicated in the legend.

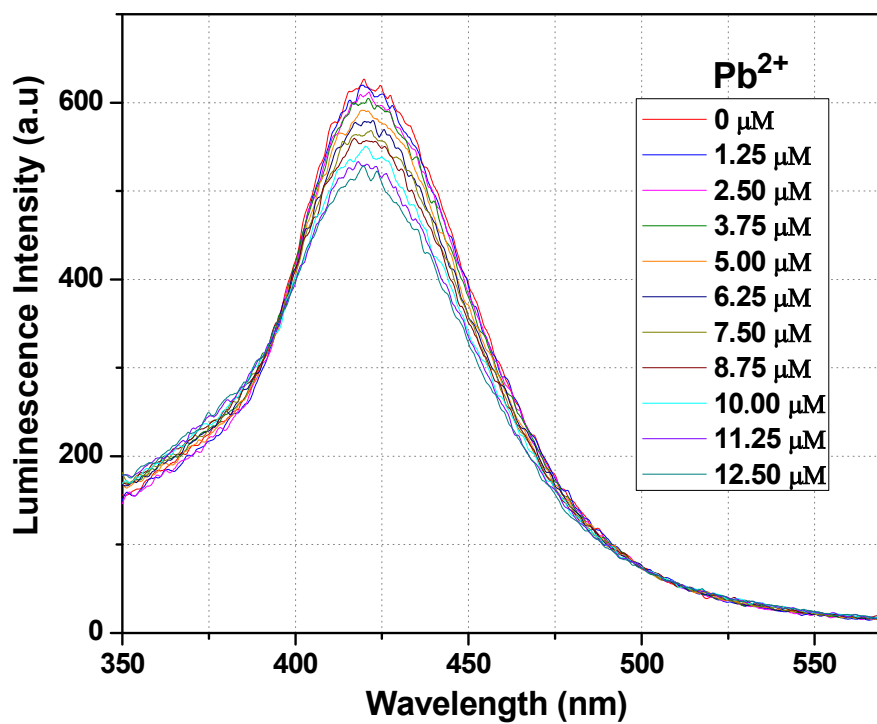

**Fig. S13.** Emission spectra of **1** dispersed in water upon incremental addition of  $Pb^{2+}$  solution ( $\lambda_{ex} = 300$  nm). Final concentration of  $Pb^{2+}$  in the medium is indicated in the legend.



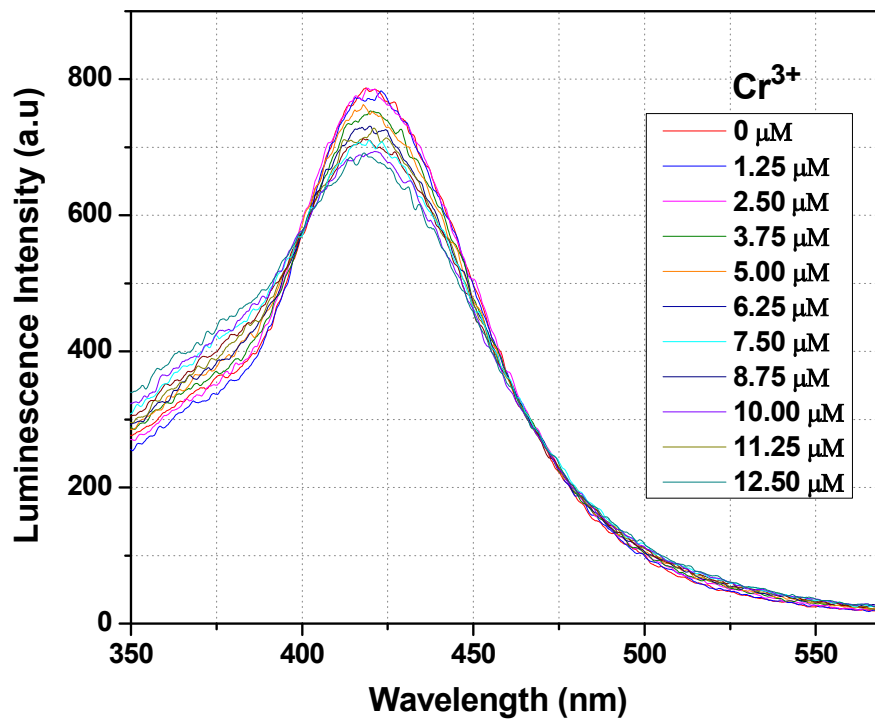

**Fig. S14.** Emission spectra of **1** dispersed in water upon incremental addition of Cr<sup>3+</sup> solution ( $\lambda_{\text{ex}} = 300$  nm). Final concentration of Cr<sup>3+</sup> in the medium is indicated in the legend.

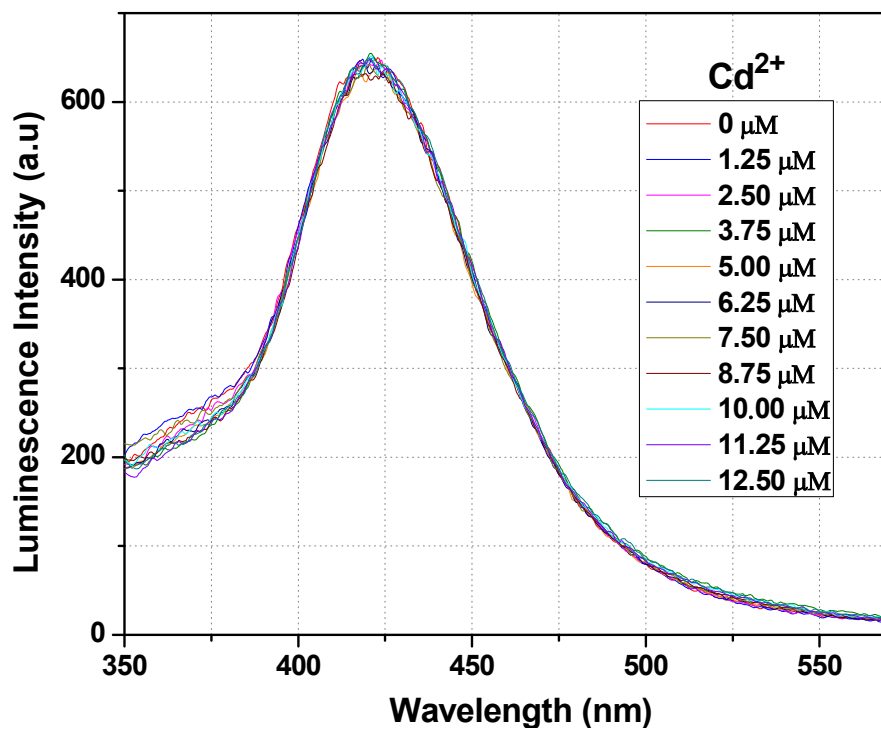

**Fig. S15.** Emission spectra of **1** dispersed in water upon incremental addition of Cd<sup>2+</sup> solution ( $\lambda_{\text{ex}} = 300$  nm). Final concentration of Cd<sup>2+</sup> in the medium is indicated in the legend.

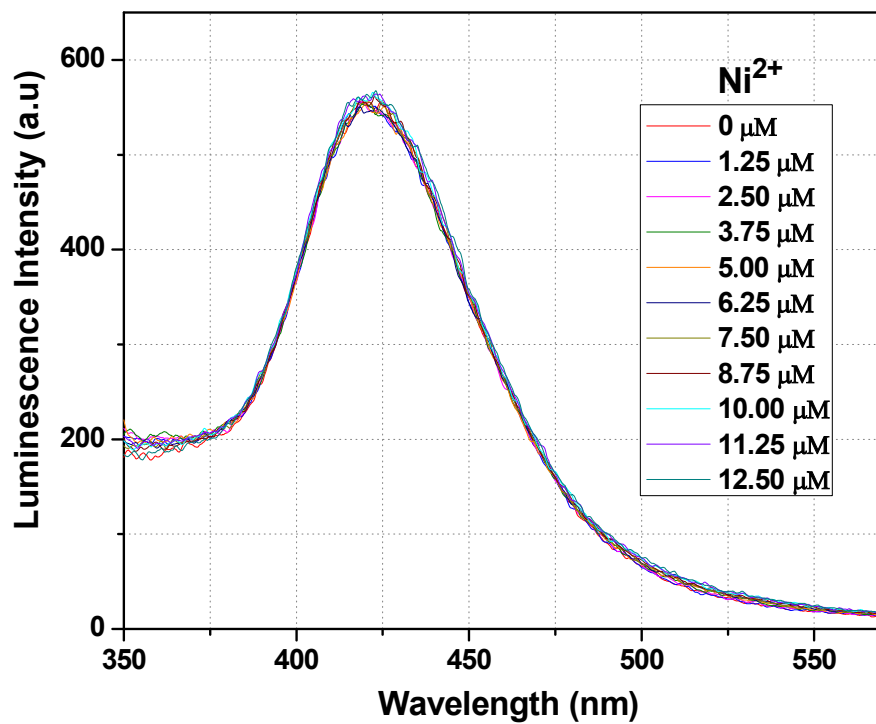

**Fig. S16.** Emission spectra of **1** dispersed in water upon incremental addition of Ni<sup>2+</sup> solution ( $\lambda_{\text{ex}} = 300$  nm). Final concentration of Ni<sup>2+</sup> in the medium is indicated in the legend.

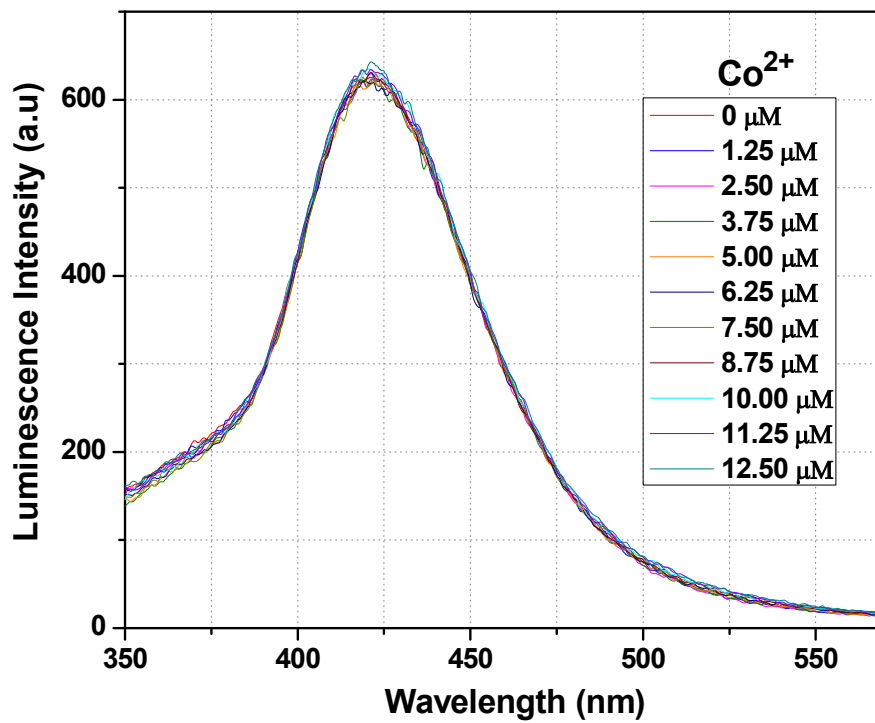

**Fig. S17.** Emission spectra of **1** dispersed in water upon incremental addition of  $\text{Co}^{2+}$  solution ( $\lambda_{\text{ex}} = 300 \text{ nm}$ ). Final concentration of  $\text{Co}^{2+}$  in the medium is indicated in the legend.

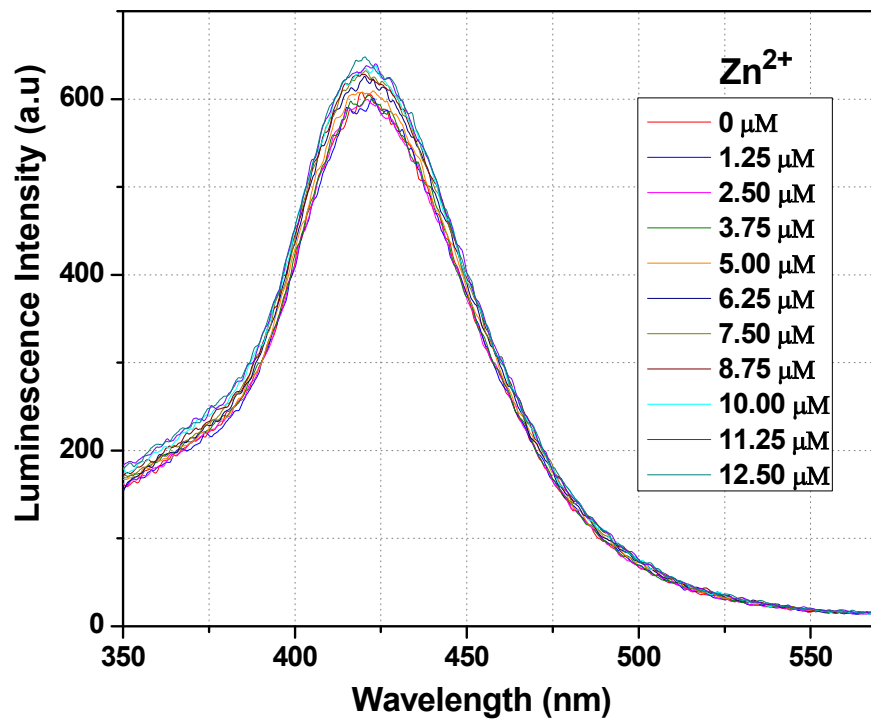

**Fig. S18.** Emission spectra of **1** dispersed in water upon incremental addition of Zn<sup>2+</sup> solution ( $\lambda_{\text{ex}} = 300$  nm). Final concentration of Zn<sup>2+</sup> in the medium is indicated in the legend.

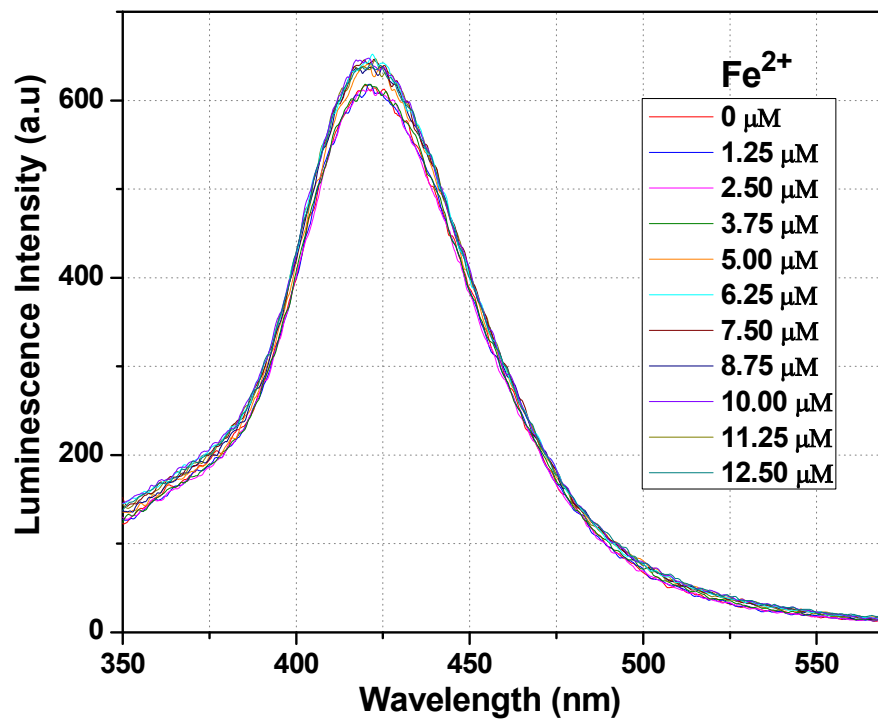

**Fig. S19.** Emission spectra of **1** dispersed in water upon incremental addition of Fe<sup>2+</sup> solution ( $\lambda_{\text{ex}} = 300$  nm). Final concentration of Fe<sup>2+</sup> in the medium is indicated in the legend.

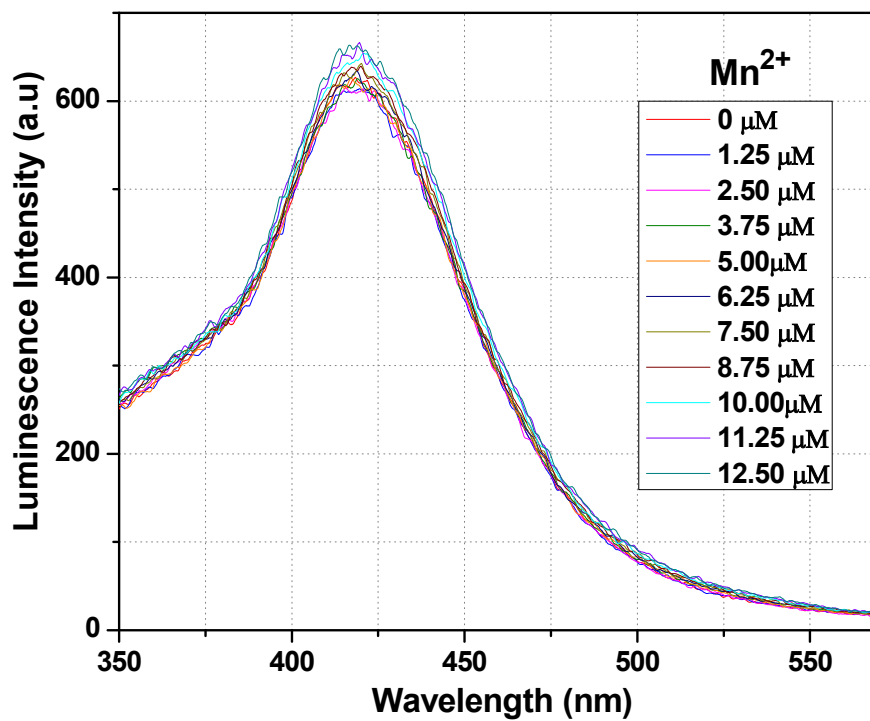

**Fig. S20.** Emission spectra of **1** dispersed in water upon incremental addition of Mn<sup>2+</sup> solution ( $\lambda_{\text{ex}} = 300$  nm). Final concentration of Mn<sup>2+</sup> in the medium is indicated in the legend.

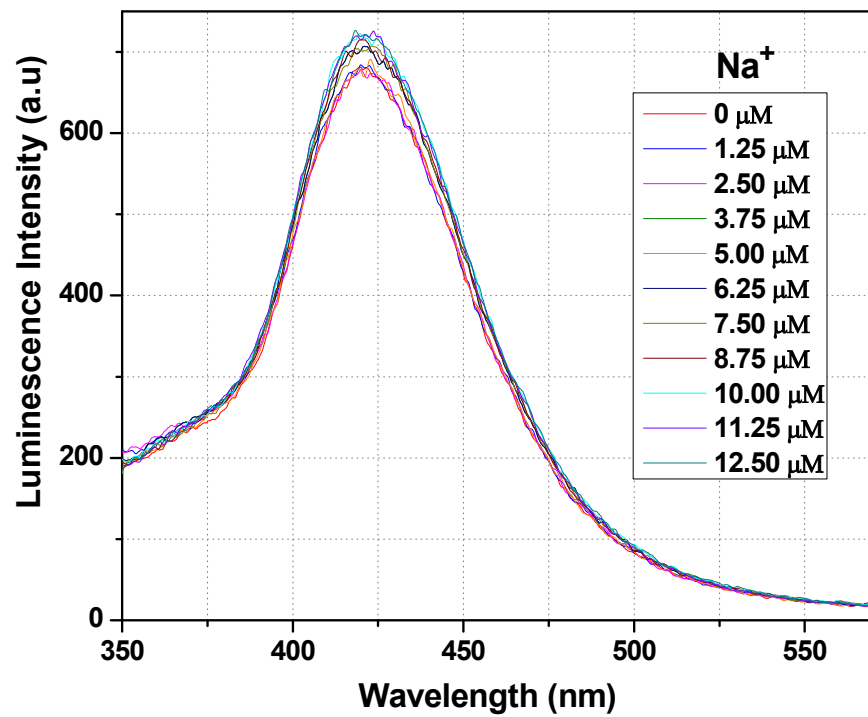

**Fig. S21.** Emission spectra of **1** dispersed in water upon incremental addition of Na<sup>+</sup> solution ( $\lambda_{\text{ex}} = 300$  nm). Final concentration of Na<sup>+</sup> in the medium is indicated in the legend.



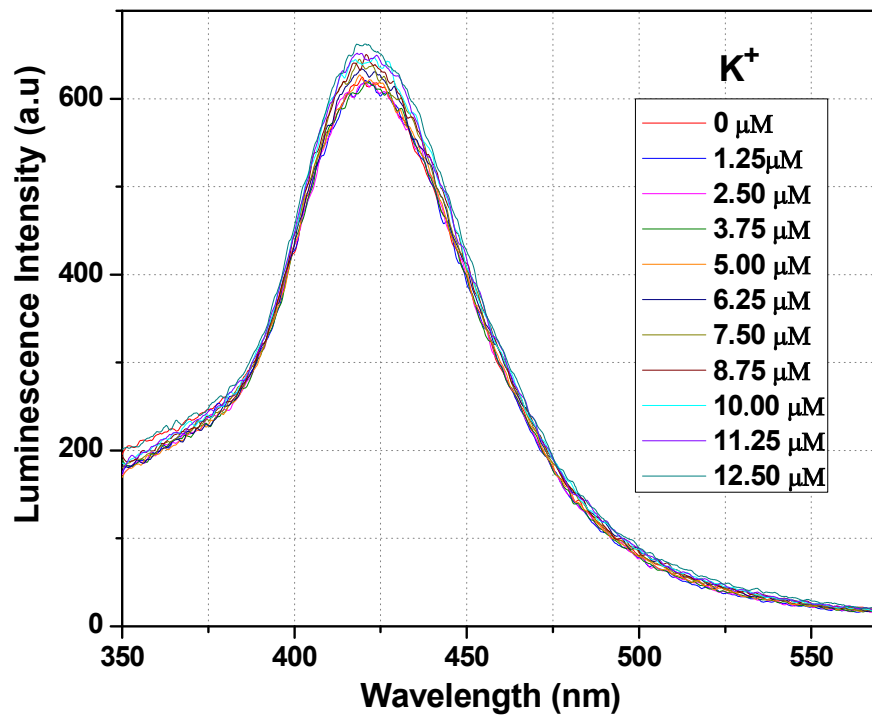

**Fig. S22.** Emission spectra of **1** dispersed in water upon incremental addition of K<sup>+</sup> solution ( $\lambda_{\text{ex}} = 300$  nm). Final concentration of K<sup>+</sup> in the medium is indicated in the legend.

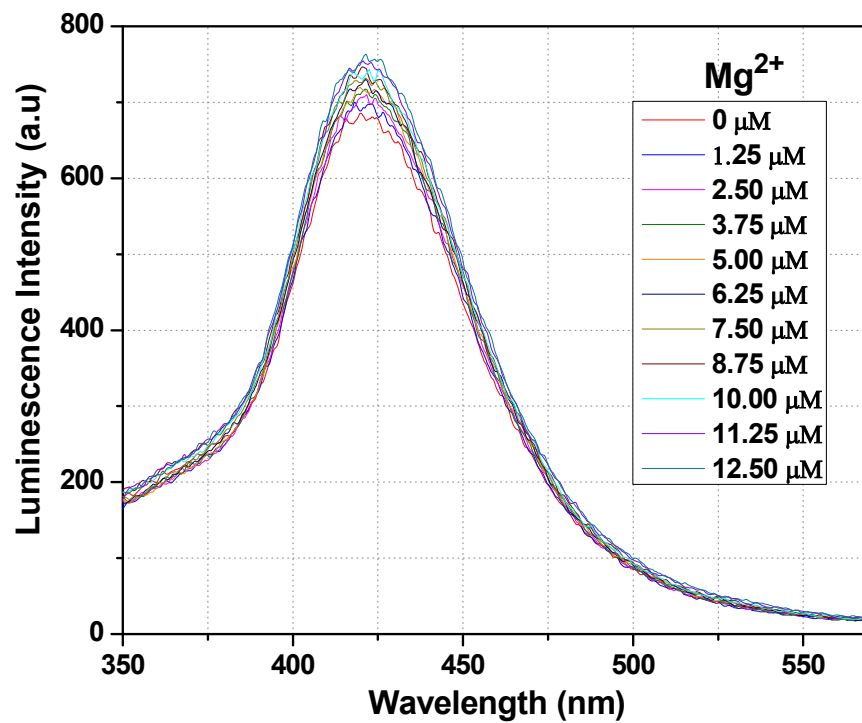

**Fig. S23.** Emission spectra of **1** dispersed in water upon incremental addition of Mg<sup>2+</sup> solution ( $\lambda_{\text{ex}} = 300$  nm). Final concentration of Mg<sup>2+</sup> in the medium is indicated in the legend.

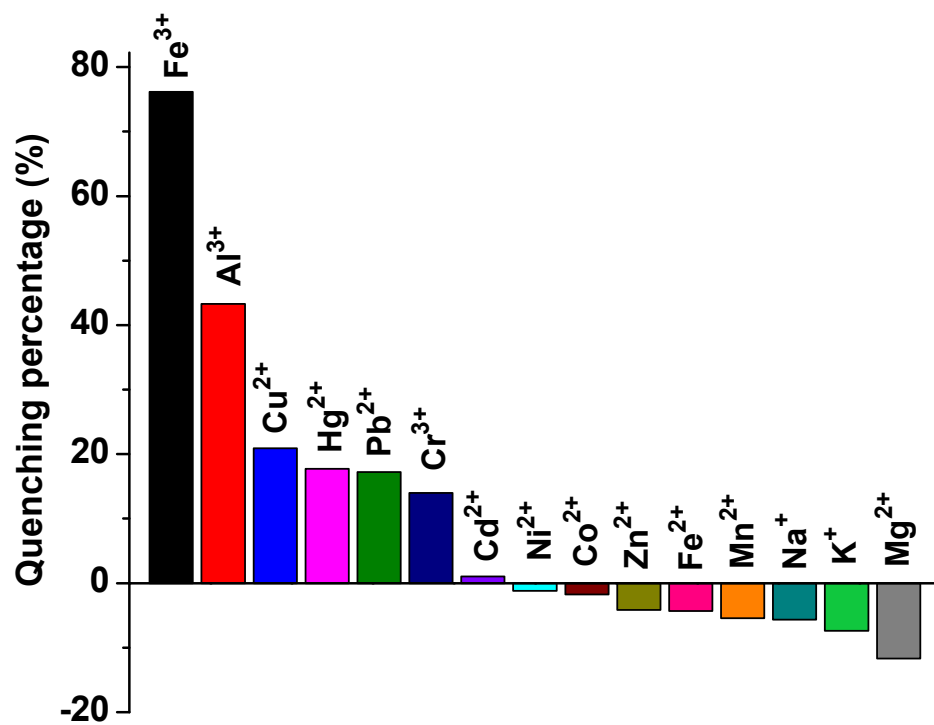

Fig. S24. Change in quenching percentage based on the emission of 1 (at 421 nm) with 12.5  $\mu\text{M}$  of different metal ions. The colour bars are the data points for 1 in presence of the indicated metal ions.

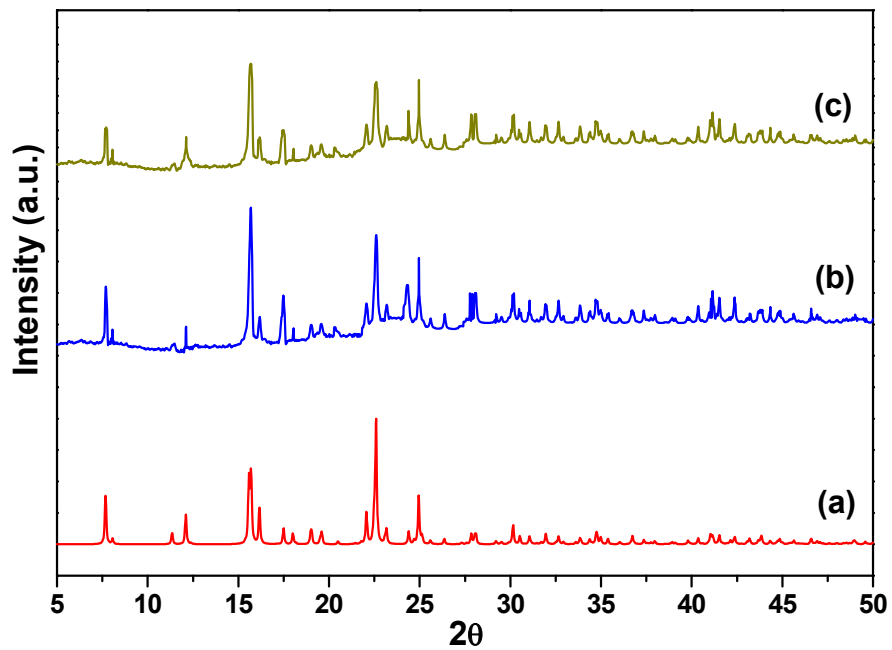

**Fig. S25.** Powder XRD patterns of **1**, (a) simulated from single crystal X-ray data, (b) after immersing in aqueous solution of  $\text{Al}^{3+}$  ions and (c) after immersing in aqueous solution of  $\text{Fe}^{3+}$  ions.

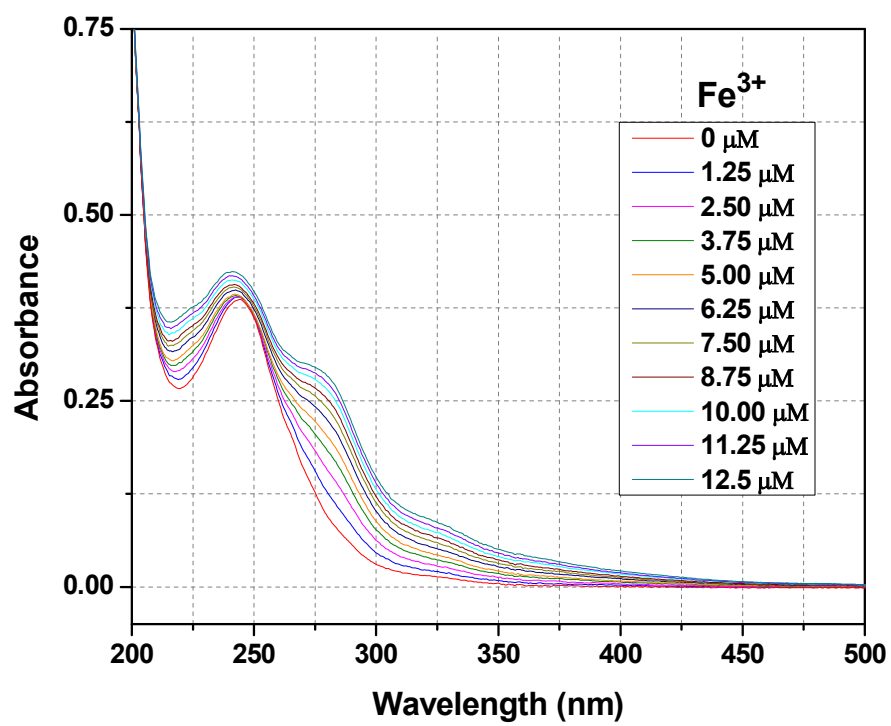

Fig. S26. Absorption spectra of **1** dispersed in water upon incremental addition of Fe<sup>3+</sup> solution. Final concentration of Fe<sup>3+</sup> in the medium is indicated in the legend.

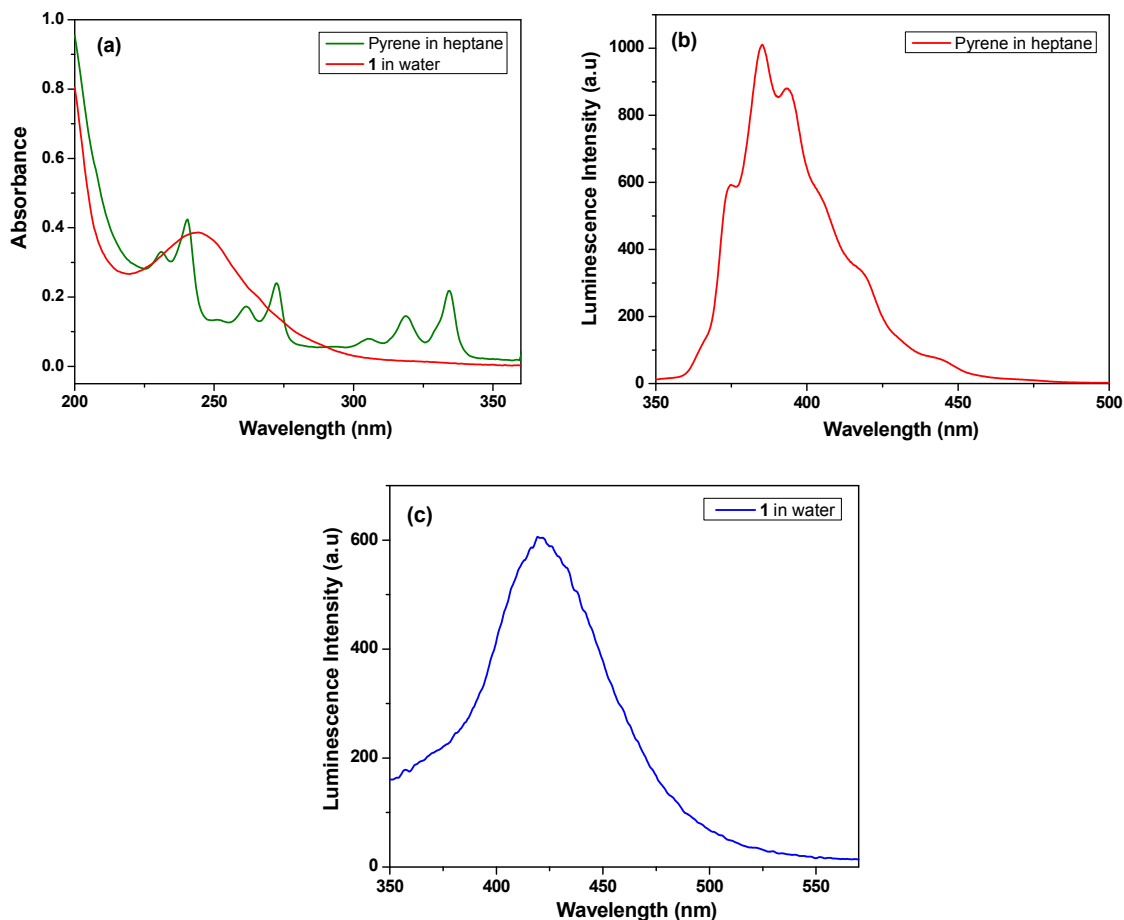

**Fig. S27.** (a) Absorption spectra of **1** dispersed in water and pyrene in heptane (b) luminescence spectra of pyrene in heptane upon excitation at 300 nm (c) luminescence spectra of **1** dispersed in water upon excitation at 300 nm.

**Determination of quantum yield:**

$$\phi_f^i = \frac{F^i f_s n_i^2}{F^s f_i n_s^2} \phi_f^s$$

where  $\phi_f^i$  and  $\phi_f^s$  are the fluorescence QYs of the sample and that of the standard, respectively;  $F^i$  and  $F^s$  are the integrated intensities (areas) of sample and standard spectra, respectively;  $f_s$  and  $f_i$  are the absorbance factor of standard and sample, respectively; the refractive indices of the sample and reference solution are  $n_i$  and  $n_s$ , respectively.

$$\phi_f^i = \frac{49453 \times 0.0365 \times 1.33^2}{51744 \times 0.0304 \times 1.38^2} \times 0.3$$

$$\phi_f^i = 0.32$$

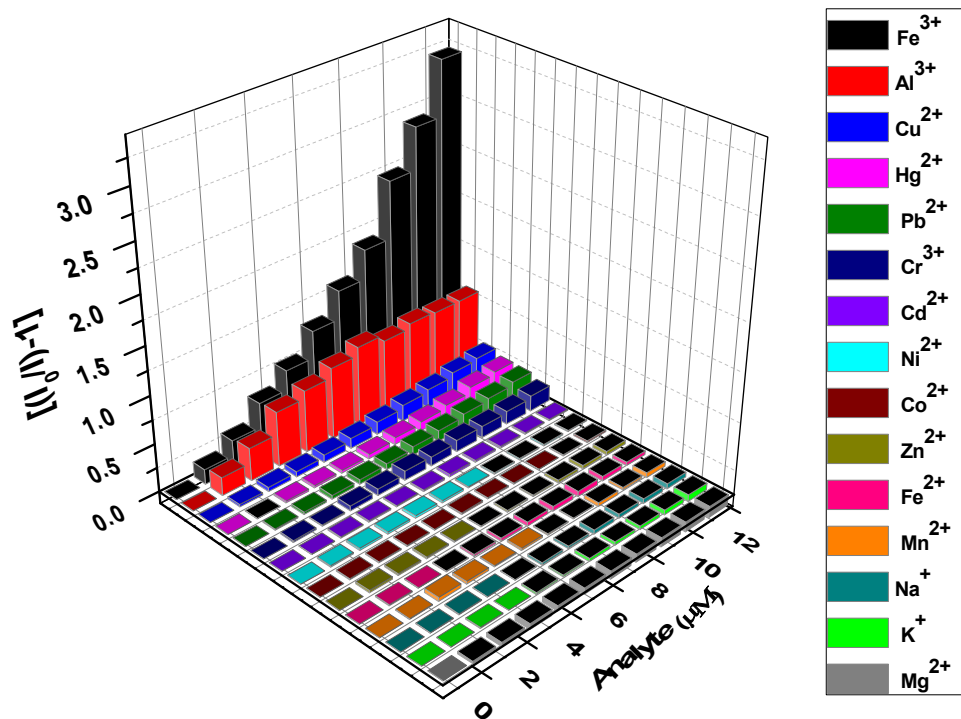

Fig. S28. Plot of  $[(I_0/I)-1]$  of **1** vs. concentration of analytes having concentration range of analytes up to 12.5  $\mu\text{M}$ .

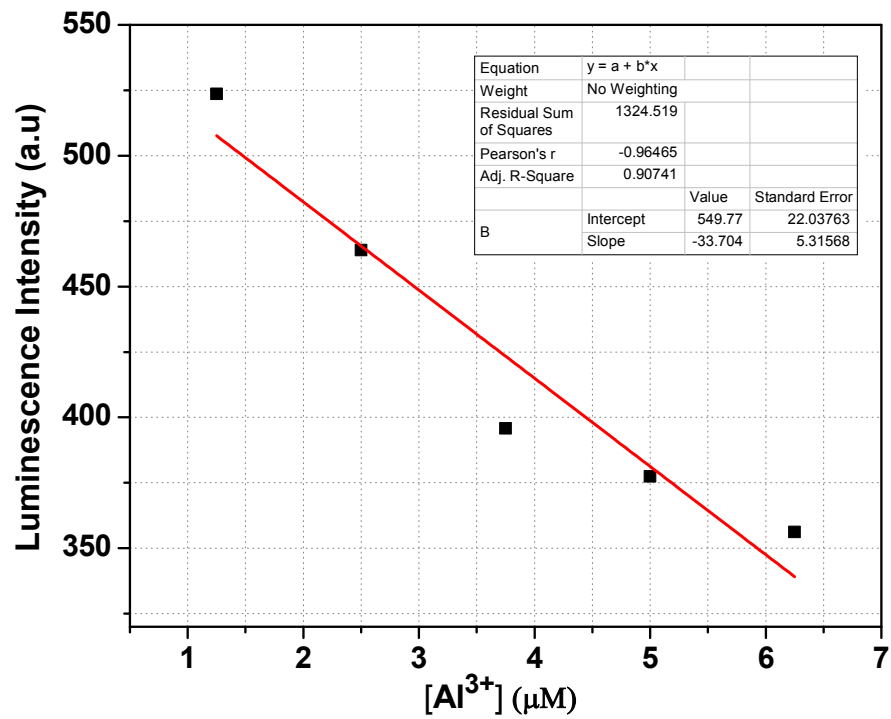

Fig. S29. Change in the Luminescence intensity of **1** in aqueous solution as a function of Al<sup>3+</sup> concentration.



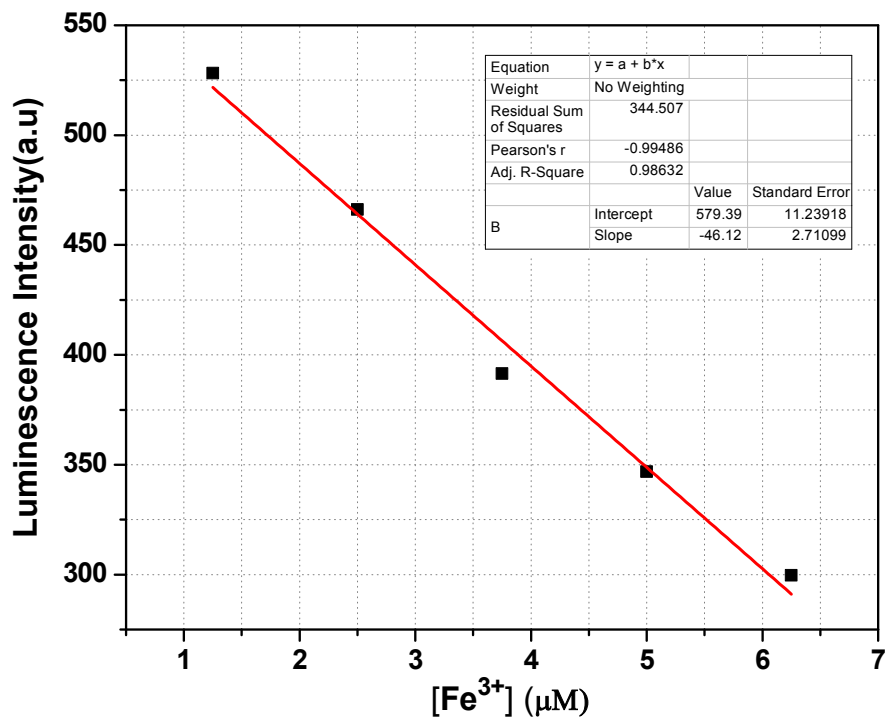

Fig. S30. Change in the Luminescence intensity of **1** in aqueous solution as a function of Fe<sup>3+</sup> concentration.

**Table S4: Calculation of standard deviation and Limit of Detection (LOD) for Al<sup>3+</sup> and Fe<sup>3+</sup>:**

| Blank Reading (only 1) | Fluorescence Intensities<br>at 421 nm ( $X$ ) | Mean ( $\bar{x}$ ) | Standard Deviation ( $\sigma$ ) =<br>$\sqrt{\frac{\sum  X - \bar{x} ^2}{N}}$ |
|------------------------|-----------------------------------------------|--------------------|------------------------------------------------------------------------------|
| Reading 1              | 635.2                                         | 638.38             | 3.954                                                                        |
| Reading 2              | 638.8                                         |                    |                                                                              |
| Reading 3              | 636.1                                         |                    |                                                                              |
| Reading 4              | 635.9                                         |                    |                                                                              |
| Reading 5              | 645.9                                         |                    |                                                                              |

Slope,  $m$  for Al<sup>3+</sup> = 33.70

Slope,  $m$  for Fe<sup>3+</sup> = 46.12

LOD for Al<sup>3+</sup> =  $3\sigma/m = (3 \times 3.954)/33.70 = 0.35 \mu\text{M} = 8.44 \text{ ppb}$

LOD for Fe<sup>3+</sup> =  $3\sigma/m = (3 \times 3.954)/46.12 = 0.25 \mu\text{M} = 13.59 \text{ ppb}$

where,  $\sigma$  is the standard deviation and  $m$  is the slope of the plot of Luminescence Intensity vs. Concentration of analyte.

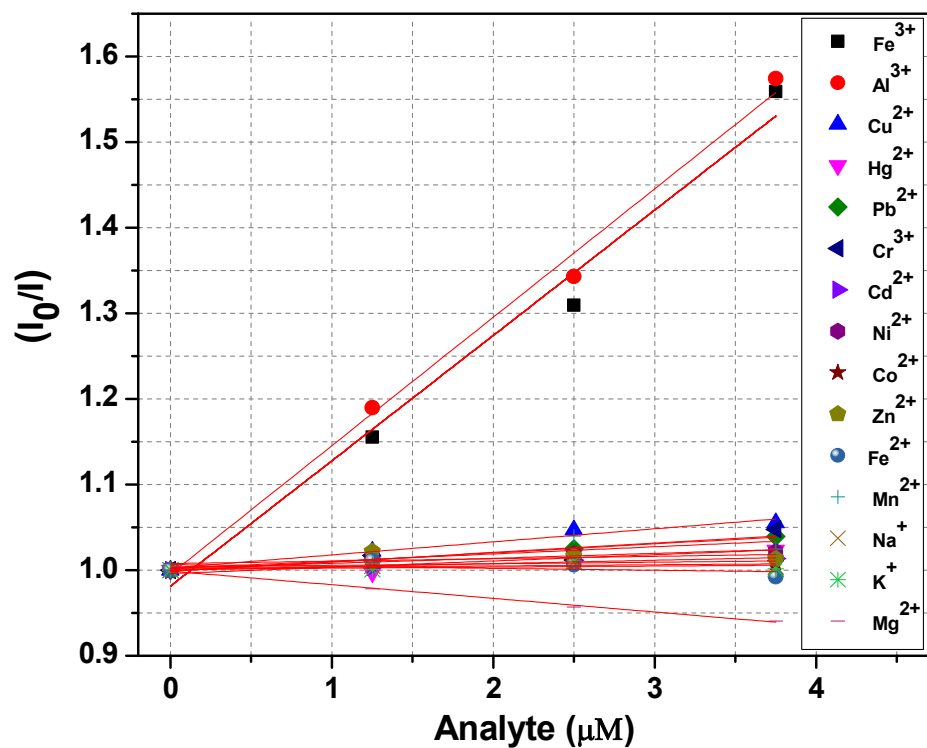

Fig. S31. Plot of luminescence intensity ratio of **1** vs. concentration of analytes.  $I_0$  and  $I$  are luminescence intensity in absence and presence of analytes, respectively. The slopes indicate the  $K_{SV}$  value. The red lines are the best fitted lines to the experimental data.

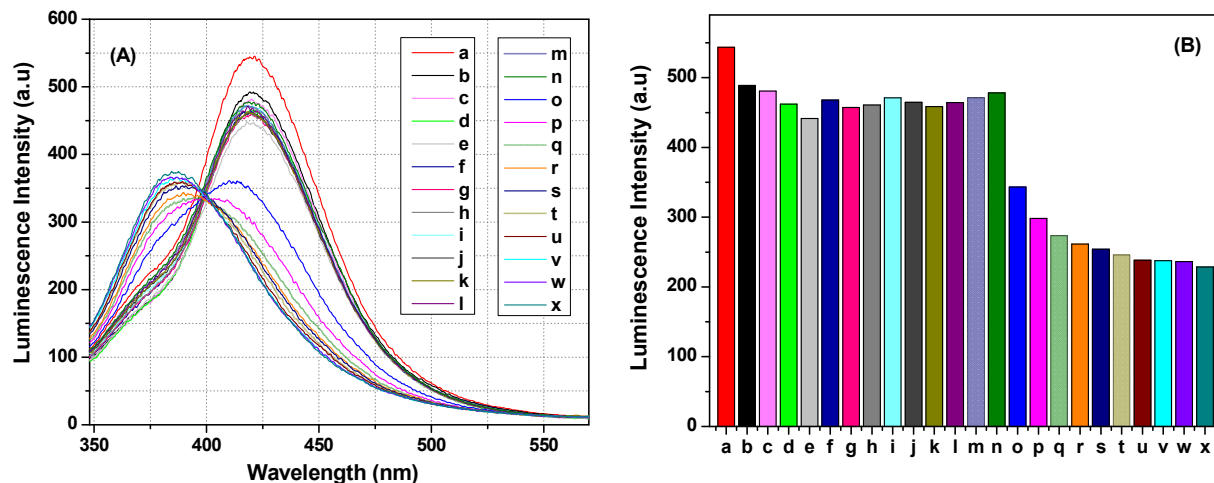

**Fig. S32.** (A) Emission spectra of **1** dispersed in aqueous solution upon the sequential addition of different metal ions followed by  $\text{Al}^{3+}$  solution ( $\lambda_{\text{ex}} = 300 \text{ nm}$ ). (B) Bar diagram showing the luminescence intensity (monitored at 421 nm) after the sequential addition of other metal ions and  $\text{Al}^{3+}$  ion. The composition and concentration of the system were as follows: (a) **1** in aqueous solution, (b) a + 2.5  $\mu\text{M}$   $\text{Cu}^{2+}$ , (c) b + 2.5  $\mu\text{M}$   $\text{Hg}^{2+}$ , (d) c + 2.5  $\mu\text{M}$   $\text{Pb}^{2+}$ , (e) d + 2.5  $\mu\text{M}$   $\text{Cr}^{3+}$ , (f) e + 2.5  $\mu\text{M}$   $\text{Cd}^{2+}$ , (g) f + 2.5  $\mu\text{M}$   $\text{Ni}^{2+}$ , (h) g + 2.5  $\mu\text{M}$   $\text{Co}^{2+}$ , (i) h + 2.5  $\mu\text{M}$   $\text{Zn}^{2+}$ , (j) i + 2.5  $\mu\text{M}$   $\text{Fe}^{2+}$ , (k) j + 2.5  $\mu\text{M}$   $\text{Mn}^{2+}$ , (l) k + 2.5  $\mu\text{M}$   $\text{Na}^{+}$  (m) l + 2.5  $\mu\text{M}$   $\text{K}^{+}$ , (n) m + 2.5  $\mu\text{M}$   $\text{Mg}^{2+}$ , (o) n + 1.25  $\mu\text{M}$   $\text{Al}^{3+}$ , (p) n + 2.5  $\mu\text{M}$   $\text{Al}^{3+}$ , (q) n + 3.75  $\mu\text{M}$   $\text{Al}^{3+}$ , (r) n + 5  $\mu\text{M}$   $\text{Al}^{3+}$ , (s) n + 6.25  $\mu\text{M}$   $\text{Al}^{3+}$ , (t) n + 7.5  $\mu\text{M}$   $\text{Al}^{3+}$ , (u) n + 8.25  $\mu\text{M}$   $\text{Al}^{3+}$ , (v) n + 10  $\mu\text{M}$   $\text{Al}^{3+}$ , (w) n + 11.25  $\mu\text{M}$   $\text{Al}^{3+}$  and (x) n + 12.5  $\mu\text{M}$   $\text{Al}^{3+}$ .

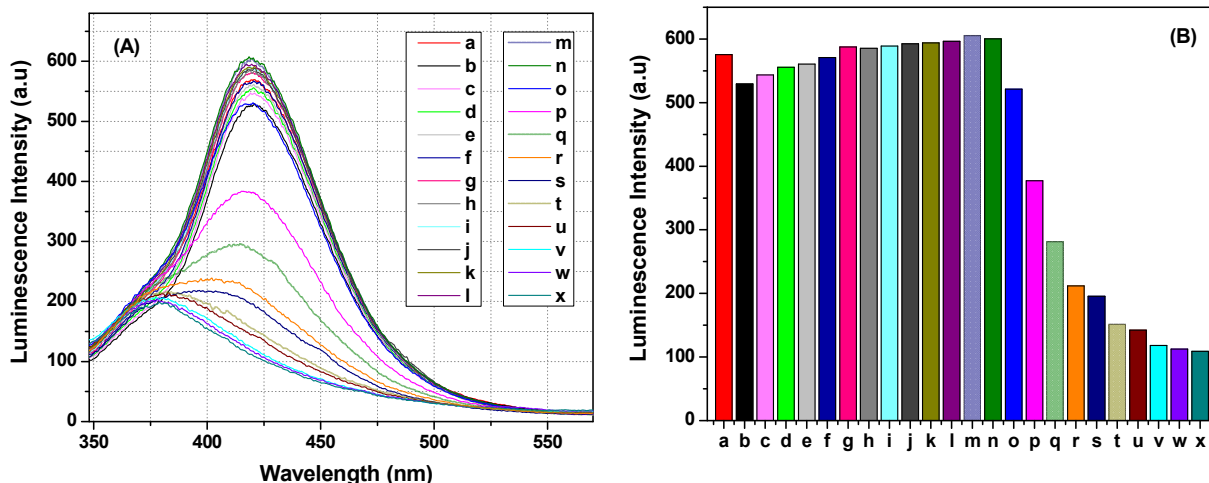

**Fig. S33.** (A) Emission spectra of **1** dispersed in aqueous solution upon the sequential addition of different metal ions followed by  $\text{Fe}^{3+}$  solution ( $\lambda_{\text{ex}} = 300 \text{ nm}$ ). (B) Bar diagram showing the luminescence intensity (monitored at 421 nm) after the sequential addition of the other metal ions and  $\text{Fe}^{3+}$  ion. The composition and concentration of the system were as follows: (a) **1** in aqueous solution, (b) a + 2.5  $\mu\text{M}$   $\text{Cu}^{2+}$ , (c) b + 2.5  $\mu\text{M}$   $\text{Hg}^{2+}$ , (d) c + 2.5  $\mu\text{M}$   $\text{Pb}^{2+}$ , (e) d + 2.5  $\mu\text{M}$   $\text{Cr}^{3+}$ , (f) e + 2.5  $\mu\text{M}$   $\text{Cd}^{2+}$ , (g) f + 2.5  $\mu\text{M}$   $\text{Ni}^{2+}$ , (h) g + 2.5  $\mu\text{M}$   $\text{Co}^{2+}$ , (i) h + 2.5  $\mu\text{M}$   $\text{Zn}^{2+}$ , (j) i + 2.5  $\mu\text{M}$   $\text{Fe}^{2+}$ , (k) j + 2.5  $\mu\text{M}$   $\text{Mn}^{2+}$ , (l) k + 2.5  $\mu\text{M}$   $\text{Na}^+$  (m) l + 2.5  $\mu\text{M}$   $\text{K}^+$ , (n) m + 2.5  $\mu\text{M}$   $\text{Mg}^{2+}$ , (o) n + 1.25  $\mu\text{M}$   $\text{Fe}^{3+}$ , (p) n + 2.5  $\mu\text{M}$   $\text{Fe}^{3+}$ , (q) n + 3.75  $\mu\text{M}$   $\text{Fe}^{3+}$ , (r) n + 5  $\mu\text{M}$   $\text{Fe}^{3+}$ , (s) n + 6.25  $\mu\text{M}$   $\text{Fe}^{3+}$ , (t) n + 7.5  $\mu\text{M}$   $\text{Fe}^{3+}$ , (u) n + 8.25  $\mu\text{M}$   $\text{Fe}^{3+}$ , (v) n + 10  $\mu\text{M}$   $\text{Fe}^{3+}$ , (w) n + 11.25  $\mu\text{M}$   $\text{Fe}^{3+}$  and (x) n + 12.5  $\mu\text{M}$   $\text{Fe}^{3+}$ .

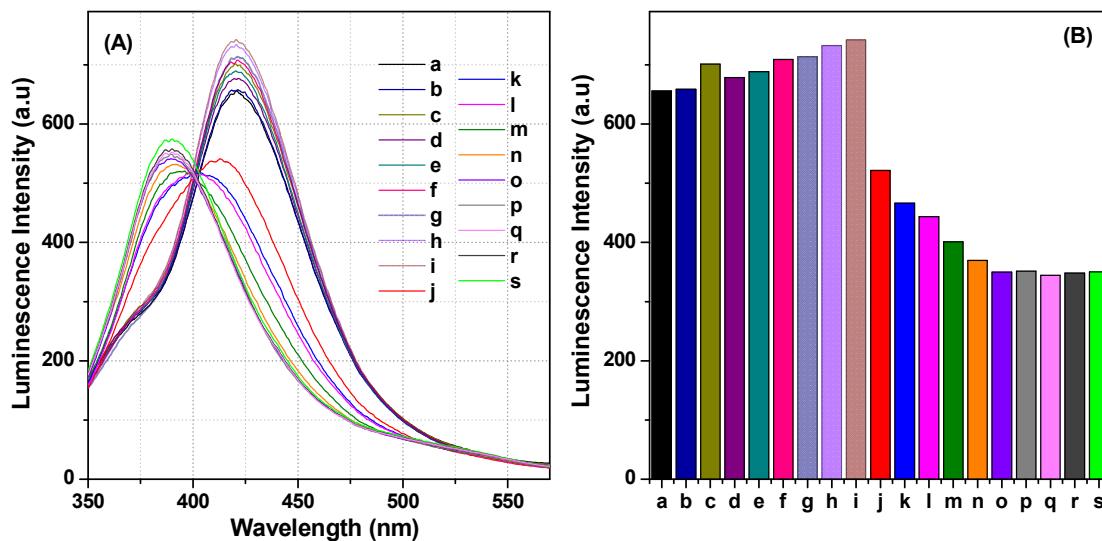

**Fig. S34.** (A) Emission spectra of **1** dispersed in aqueous solution upon the sequential addition of different anions followed by  $\text{Al}^{3+}$  solution ( $\lambda_{\text{ex}} = 300$  nm). (B) Bar diagram showing the luminescence intensity (monitored at 421 nm) after the sequential addition of the other anions and  $\text{Al}^{3+}$  ion. The composition and concentration of the system were as follows: (a) **1** in aqueous solution, (b) a + 2.5  $\mu\text{M}$   $\text{Cl}^-$ , (c) b + 2.5  $\mu\text{M}$   $\text{F}^-$ , (d) c + 2.5  $\mu\text{M}$   $\text{Br}^-$ , (e) d + 2.5  $\mu\text{M}$   $\text{I}^-$ , (f) e + 2.5  $\mu\text{M}$   $\text{CO}_3^{2-}$ , (g) f + 2.5  $\mu\text{M}$   $\text{NO}_2^-$ , (h) g + 2.5  $\mu\text{M}$   $\text{NO}_3^-$ , (i) h + 2.5  $\mu\text{M}$   $\text{SO}_4^{2-}$ , (j) i + 1.25  $\mu\text{M}$   $\text{Al}^{3+}$ , (k) i + 2.5  $\mu\text{M}$   $\text{Al}^{3+}$ , (l) i + 3.75  $\mu\text{M}$   $\text{Al}^{3+}$  (m) i + 5  $\mu\text{M}$   $\text{Al}^{3+}$ , (n) i + 6.25  $\mu\text{M}$   $\text{Al}^{3+}$ , (o) i + 7.5  $\mu\text{M}$   $\text{Al}^{3+}$ , (p) i + 8.25  $\mu\text{M}$   $\text{Al}^{3+}$ , (q) i + 10  $\mu\text{M}$   $\text{Al}^{3+}$ , (r) i + 11.25  $\mu\text{M}$   $\text{Al}^{3+}$  and (s) i + 12.5  $\mu\text{M}$   $\text{Al}^{3+}$ .

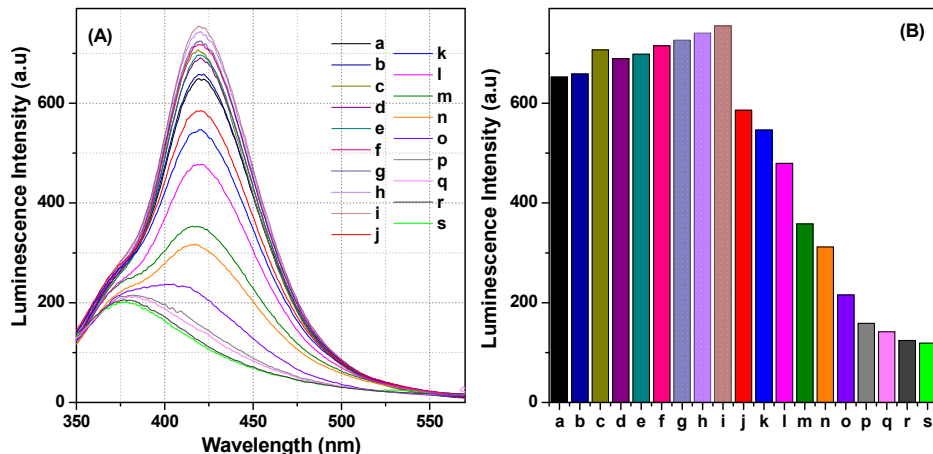

**Fig. S35.** (A) Emission spectra of **1** dispersed in aqueous solution upon the sequential addition of different anions followed by  $\text{Fe}^{3+}$  solution ( $\lambda_{\text{ex}} = 300$  nm). (B) Bar diagram showing the luminescence intensity (monitored at 421 nm) after the sequential addition of the other anions and  $\text{Fe}^{3+}$  ion. The composition and concentration of the system were as follows: (a) **1** in aqueous solution, (b) a + 2.5  $\mu\text{M}$   $\text{Cl}^-$ , (c) b + 2.5  $\mu\text{M}$   $\text{F}^-$ , (d) c + 2.5  $\mu\text{M}$   $\text{Br}^-$ , (e) d + 2.5  $\mu\text{M}$   $\text{I}^-$ , (f) e + 2.5  $\mu\text{M}$   $\text{CO}_3^{2-}$ , (g) f + 2.5  $\mu\text{M}$   $\text{NO}_2^-$ , (h) g + 2.5  $\mu\text{M}$   $\text{NO}_3^-$ , (i) h + 2.5  $\mu\text{M}$   $\text{SO}_4^{2-}$ , (j) i + 1.25  $\mu\text{M}$   $\text{Fe}^{3+}$ , (k) i + 2.5  $\mu\text{M}$   $\text{Fe}^{3+}$ , (l) i + 3.75  $\mu\text{M}$   $\text{Fe}^{3+}$ , (m) i + 5  $\mu\text{M}$   $\text{Fe}^{3+}$ , (n) i + 6.25  $\mu\text{M}$   $\text{Fe}^{3+}$ , (o) i + 7.5  $\mu\text{M}$   $\text{Fe}^{3+}$ , (p) i + 8.25  $\mu\text{M}$   $\text{Fe}^{3+}$ , (q) i + 10  $\mu\text{M}$   $\text{Fe}^{3+}$ , (r) i + 11.25  $\mu\text{M}$   $\text{Fe}^{3+}$  and (s) i + 12.5  $\mu\text{M}$   $\text{Fe}^{3+}$ .

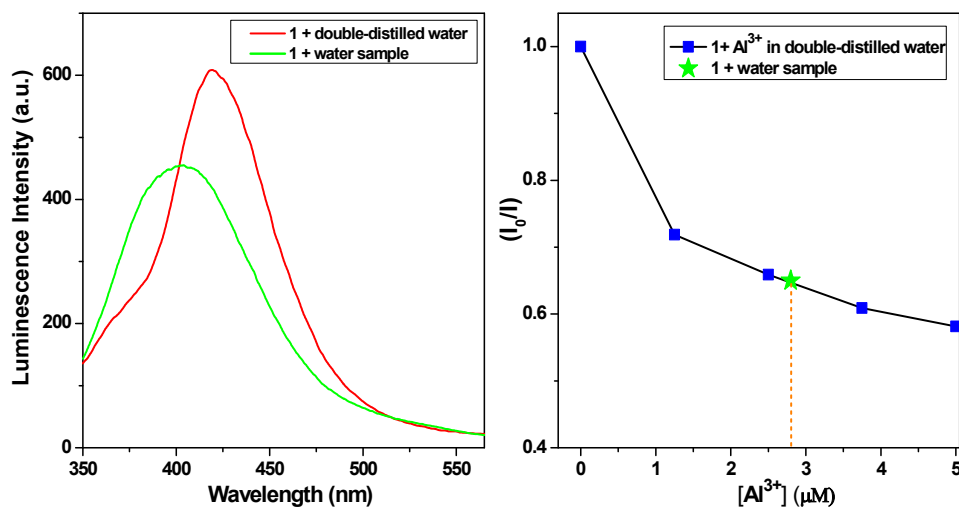

**Fig. S36.** (A) The emission spectra of **1** in double-distilled water and in water sample. (B) Stern-Volmer plot of luminescence intensity ratio ( $I_0/I$ ) of **1** monitored at 380 nm vs concentration of  $Al^{3+}$  ion.  $I_0$  and  $I$  represent the luminescence intensity of **1** in absence and presence of  $Al^{3+}$  ions, respectively. The green point denotes  $I_0/I$  ratio for **1** in water sample. The concentration of  $Al^{3+}$  in water sample is determined to be 2.8  $\mu M$ .



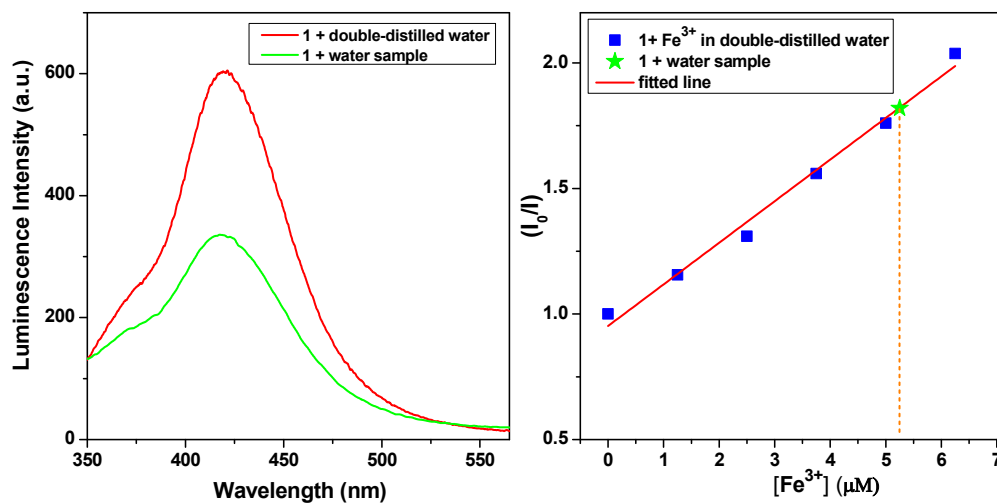

**Fig. S37.** (A) The emission spectra of **1** in double-distilled water and in water sample. (B) Stern-Volmer plot of luminescence intensity ratio ( $I_0/I$ ) of **1** monitored at 421 nm vs concentration of  $Fe^{3+}$  ion.  $I_0$  and  $I$  represent the luminescence intensity of **1** in absence and presence of  $Fe^{3+}$  ions, respectively. The green point denotes  $I_0/I$  ratio for **1** in water sample. The concentration of  $Fe^{3+}$  in water sample is determined to be 5.2  $\mu M$ .
